# Supplementary material
Source: publisher figshare collection journal article supplement (https://tandf.figshare.com/ndownloader/files/16939763)
Supplement: Supplementary file 1 [file 16939763]

**Appendix 1.** *Screenshots of participant-facing app. Approved by Cohero Health.*

**
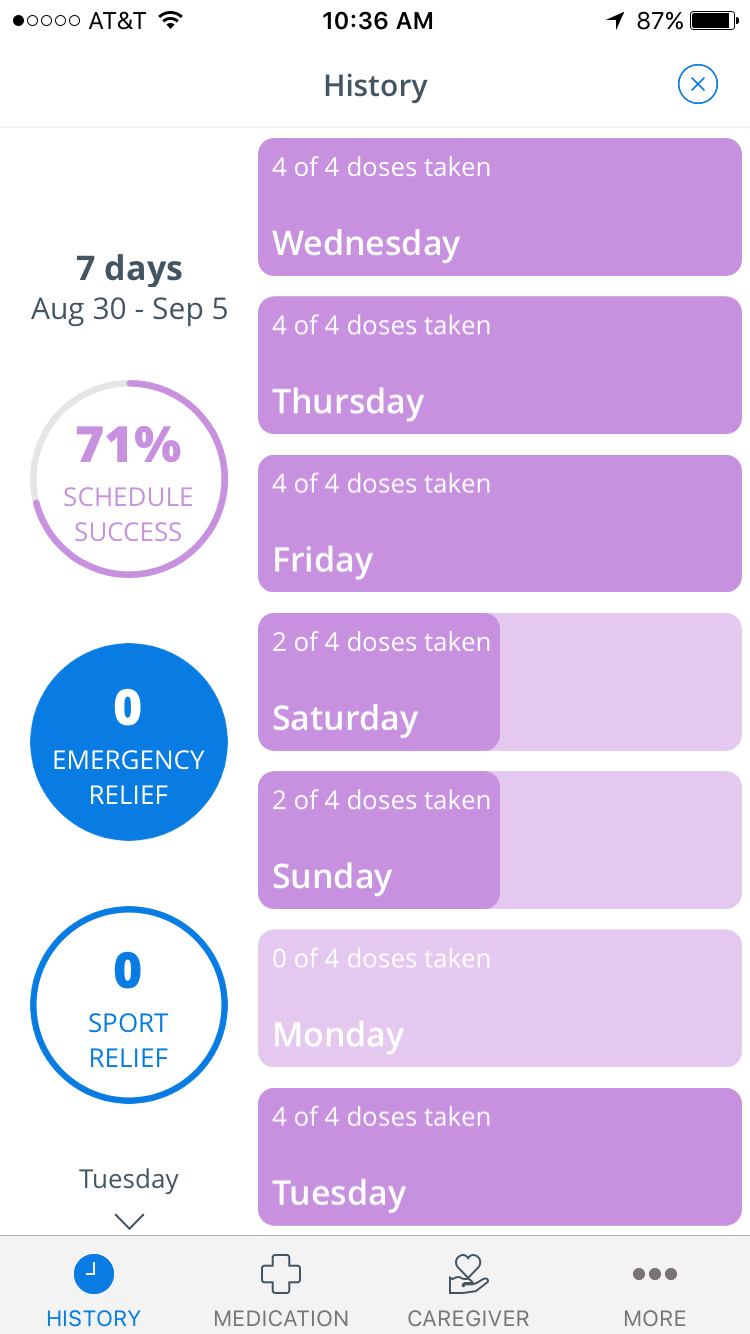
**

**
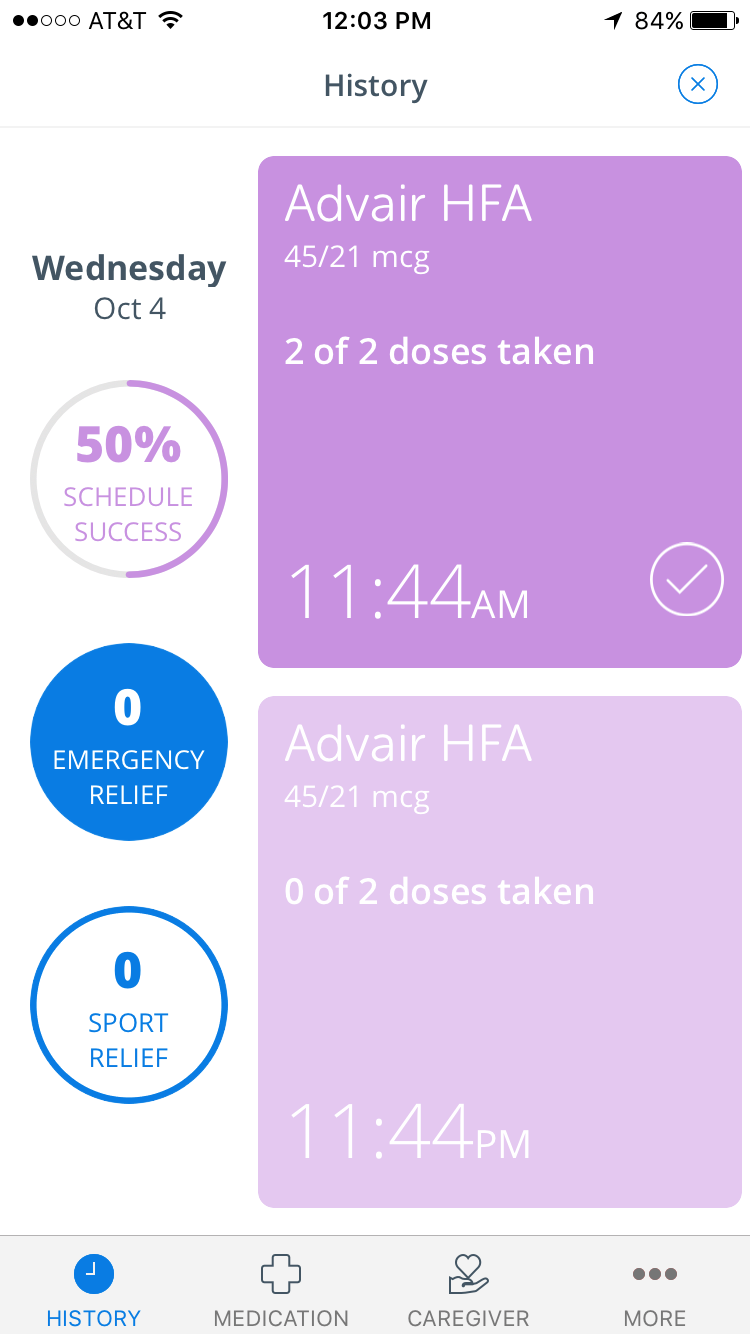
**

**Appendix 2.** *Participant messaging.*

| **Message Type** | **Push Notification Language** |
| --- | --- |
| *Daily Adherence Reminders*  *(1 per day)* | Hi! This is your friendly daily controller inhaler reminder. Quick fact: children who take controller medication daily have less future asthma attacks. |
| Hello! A friendly reminder to make sure your child took their daily controller inhaler. Even for older children, parents are an important part of improving asthma control. |
| Hi! Did your child take their daily controller inhaler today? Quick fact: when taken regularly, daily controllers reduce the number of emergency room visits. |
| Hello there! Has your child taken all of their daily controller puffs today? Remember to always use a spacer with those puffs. |
| Hi! A quick reminder to make sure that your child took their daily asthma inhaler. Quick tip: have your child take daily controller inhaler with another daily activity (tooth-brushing). |
| Greetings! This is a friendly daily controller inhaler reminder for you. When taken regularly, daily inhalers reduce the number of missed school days. |
| Hello! This is your friendly daily controller inhaler reminder. Quick tip: when your child is away from home remember to send medications and a spacer with them. |
| *Weekly Sync Reminder* | Get credit for the puffs your child took this week! Sync your inhaler sensor with your phone tonight! |
| *Weekly Feedback*  *(>75% average weekly adherence)* | Way to go! Your child took **XX** out of **YY** controller puffs last week (about 3 out of every 4 puffs). You beat your goal!  Your child earned $**XX** this week, towards their end of the month reward (**[chosen reward]**). Congrats! |
| *Weekly Feedback*  *(50-75% average weekly adherence)* | Not bad! Your child took **XX** out of **YY** puffs and earned $**XX** last week. This goes towards their **[chosen reward]** this month!  Your child’s goal is to take at least 3 out of every 4 controller puffs (75%) daily. Try this next week—you got this! |
| *Weekly Feedback*  *(<50% average weekly adherence)* | Your child took less than half of their controller puffs last week. S/he has earned $**XX** this week.  Remember, the medicine is only helpful if you take at least 3 out of every 4 puffs. Try this next week—you can do it! |
